# Supplementary material for: Cyclophosphamide Induces Lipid and Metabolite Perturbation in Amniotic Fluid during Rat Embryonic Development
Source: MDPI journal article supplement (doi:10.3390/metabo12111105), 2022-11-12
Supplement: s1 [file s1]

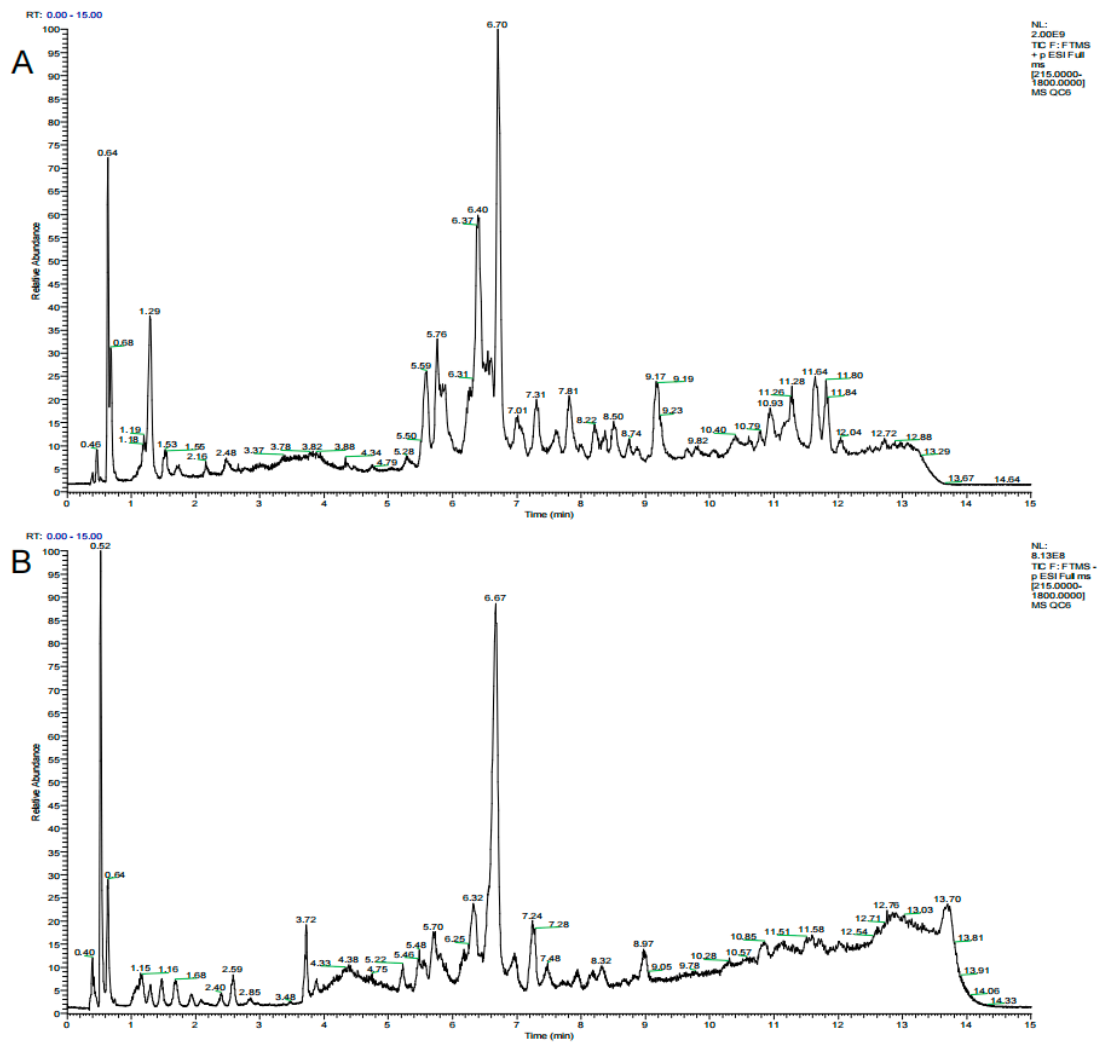

**Figure S1.** TICs of lipids from rat AF of QC samples in MS-DIAL software. (A) positive ion mode; (B) negative ion mode.

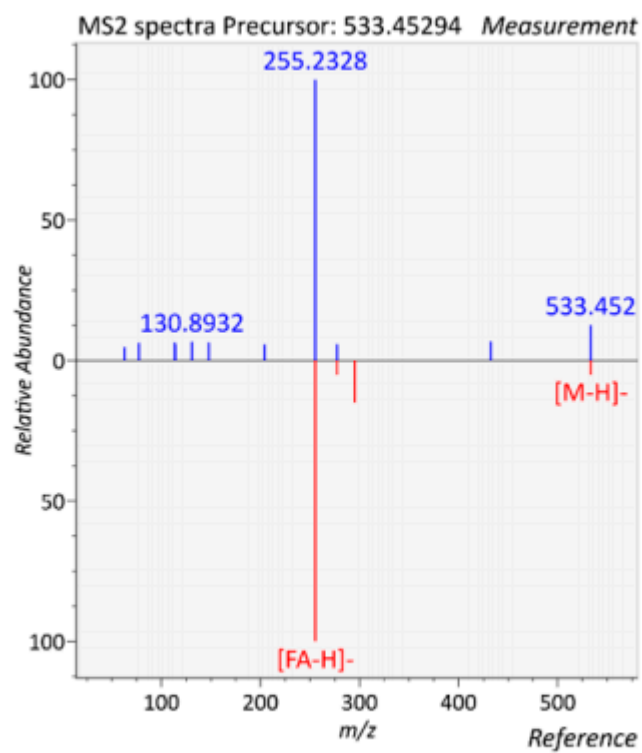

FAHFA 34:2

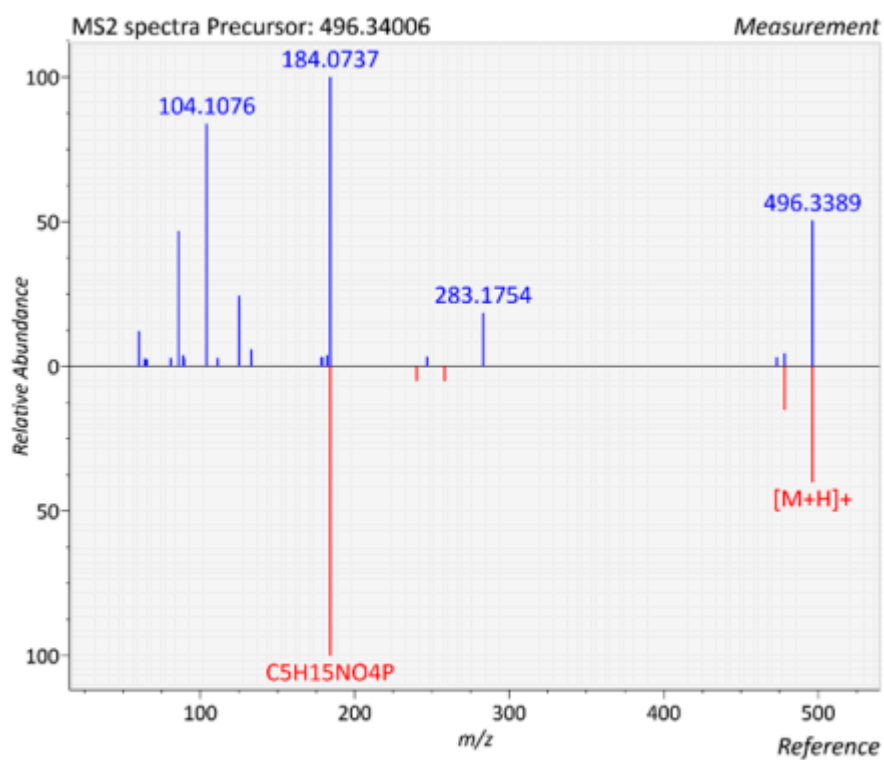

LPC 16:0

**Figure S2.** Selected lipids with matching fragmentation patterns to the LipidBlast library with MS-DIAL software

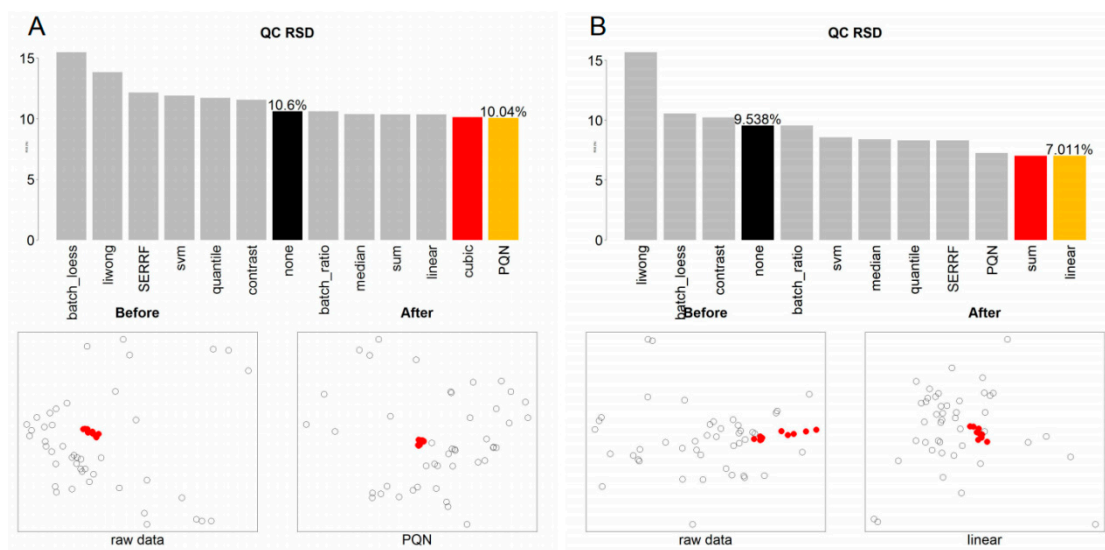

**Figure S3.** RSD values in QC samples obtained by different normalization methods  
(A) positive ion mode; (B) negative ion mode.

Table S1. Differential lipids in AF (positive ion mode)

| Significant metabolites | m/z      | Rt (min) | Adduction                         | PPM mass error | P value | FDR  | FC (CK/CP) |
|-------------------------|----------|----------|-----------------------------------|----------------|---------|------|------------|
| CAR 20:4                | 448.3406 | 1.41     | [M] <sup>+</sup>                  | -3.469         | 0.026   | 0.17 | 0.79       |
| CAR 24:0                | 512.4688 | 4.91     | [M] <sup>+</sup>                  | 2.877          | 0.002   | 0.08 | 0.67       |
| CE 24:5                 | 744.6622 | 11.43    | [M+NH <sub>4</sub> ] <sup>+</sup> | -4.213         | 0.026   | 0.17 | 0.58       |
| Cer 42:0;2O             | 652.6613 | 9.23     | [M+H] <sup>+</sup>                | 1.575          | 0.002   | 0.08 | 1.31       |
| Cer 42:1;2O             | 650.6406 | 8.60     | [M+H] <sup>+</sup>                | -6.074         | 0.002   | 0.08 | 1.35       |
| DG O-33:1               | 584.5611 | 6.55     | [M+NH <sub>4</sub> ] <sup>+</sup> | -0.233         | 0.004   | 0.08 | 1.29       |
| DG O-35:1               | 612.5910 | 7.25     | [M+NH <sub>4</sub> ] <sup>+</sup> | -2.508         | 0.004   | 0.08 | 1.24       |
| DG O-37:1               | 640.6216 | 7.94     | [M+NH <sub>4</sub> ] <sup>+</sup> | -3.429         | 0.004   | 0.08 | 1.25       |
| LPC 16:1                | 516.3032 | 1.09     | [M+Na] <sup>+</sup>               | -2.369         | 0.041   | 0.21 | 1.35       |
| LPC 16:1                | 494.3228 | 1.09     | [M+H] <sup>+</sup>                | -2.763         | 0.026   | 0.17 | 1.27       |
| LPC 18:3                | 518.3226 | 0.98     | [M+H] <sup>+</sup>                | -2.866         | 0.009   | 0.10 | 1.34       |
| LPC 19:0                | 538.3870 | 3.06     | [M+H] <sup>+</sup>                | 0.565          | 0.015   | 0.13 | 0.46       |
| LPC 20:2                | 548.3702 | 1.61     | [M+H] <sup>+</sup>                | -1.506         | 0.004   | 0.08 | 1.43       |
| LPC 20:3                | 546.3530 | 1.64     | [M+H] <sup>+</sup>                | -4.367         | 0.002   | 0.08 | 1.56       |
| PC 40:8                 | 830.5715 | 5.26     | [M+H] <sup>+</sup>                | 2.527          | 0.004   | 0.08 | 0.80       |
| PC O-40:5               | 822.6428 | 6.81     | [M+H] <sup>+</sup>                | 6.933          | 0.015   | 0.13 | 1.44       |
| PI 38:6                 | 900.5494 | 4.92     | [M+NH <sub>4</sub> ] <sup>+</sup> | -11.409        | 0.009   | 0.10 | 1.81       |
| PS 38:3                 | 814.5660 | 5.97     | [M+H] <sup>+</sup>                | 8.249          | 0.004   | 0.08 | 1.44       |
| SM 35:1;2O              | 717.5852 | 5.85     | [M+H] <sup>+</sup>                | -7.374         | 0.026   | 0.17 | 0.71       |
| TG 46:0                 | 796.7399 | 12.75    | [M+NH <sub>4</sub> ] <sup>+</sup> | 0.03           | 0.009   | 0.10 | 1.51       |
| TG 48:0                 | 824.7693 | 12.81    | [M+NH <sub>4</sub> ] <sup>+</sup> | -1.062         | 0.004   | 0.08 | 1.35       |
| TG 48:3                 | 818.7253 | 10.46    | [M+NH <sub>4</sub> ] <sup>+</sup> | 2.521          | 0.026   | 0.17 | 1.22       |
| TG 51:4                 | 858.7478 | 10.87    | [M+NH <sub>4</sub> ] <sup>+</sup> | -7.821         | 0.015   | 0.13 | 0.53       |
| TG 53:0                 | 894.8464 | 12.46    | [M+NH <sub>4</sub> ] <sup>+</sup> | -2.209         | 0.041   | 0.21 | 1.30       |
| TG 53:6                 | 882.7594 | 10.50    | [M+NH <sub>4</sub> ] <sup>+</sup> | 5.532          | 0.015   | 0.13 | 0.64       |
| TG 54:0                 | 908.8567 | 12.58    | [M+NH <sub>4</sub> ] <sup>+</sup> | -8.116         | 0.009   | 0.10 | 1.35       |
| TG 54:0                 | 908.8691 | 12.57    | [M+NH <sub>4</sub> ] <sup>+</sup> | 5.582          | 0.009   | 0.10 | 1.30       |
| TG 54:5                 | 898.7811 | 11.12    | [M+NH <sub>4</sub> ] <sup>+</sup> | -5.214         | 0.026   | 0.17 | 0.82       |
| TG 54:5                 | 903.7454 | 11.12    | [M+Na] <sup>+</sup>               | 4.59           | 0.026   | 0.17 | 0.82       |
| TG 55:0                 | 922.8779 | 12.64    | [M+NH <sub>4</sub> ] <sup>+</sup> | -1.936         | 0.004   | 0.08 | 1.31       |
| TG 55:1                 | 920.8617 | 12.48    | [M+NH <sub>4</sub> ] <sup>+</sup> | -2.581         | 0.041   | 0.21 | 1.37       |
| TG 55:4                 | 914.8077 | 11.64    | [M+NH <sub>4</sub> ] <sup>+</sup> | -10.25         | 0.009   | 0.10 | 0.32       |
| TG 55:5                 | 912.8046 | 11.34    | [M+NH <sub>4</sub> ] <sup>+</sup> | 3.4            | 0.009   | 0.10 | 0.60       |
| TG 56:0                 | 936.8996 | 12.71    | [M+NH <sub>4</sub> ] <sup>+</sup> | 4.518          | 0.015   | 0.13 | 1.30       |
| TG 56:0                 | 936.8893 | 12.72    | [M+NH <sub>4</sub> ] <sup>+</sup> | -6.433         | 0.002   | 0.08 | 1.28       |
| TG 56:10                | 916.7410 | 9.76     | [M+NH <sub>4</sub> ] <sup>+</sup> | 2.295          | 0.002   | 0.08 | 0.36       |
| TG 56:6                 | 924.7965 | 11.18    | [M+NH <sub>4</sub> ] <sup>+</sup> | -5.359         | 0.041   | 0.21 | 0.81       |
| TG 56:8                 | 925.7293 | 10.36    | [M+Na] <sup>+</sup>               | -4.049         | 0.041   | 0.21 | 0.82       |
| TG 57:0                 | 950.9137 | 12.77    | [M+NH <sub>4</sub> ] <sup>+</sup> | 2.822          | 0.009   | 0.10 | 1.22       |

|         |          |       |                                   |        |       |      |      |
|---------|----------|-------|-----------------------------------|--------|-------|------|------|
| TG 57:1 | 948.9003 | 12.65 | [M+NH <sub>4</sub> ] <sup>+</sup> | 5.231  | 0.015 | 0.13 | 1.50 |
| TG 57:7 | 936.7937 | 11.17 | [M+NH <sub>4</sub> ] <sup>+</sup> | -8.29  | 0.026 | 0.17 | 0.45 |
| TG 59:1 | 976.9228 | 12.77 | [M+NH <sub>4</sub> ] <sup>+</sup> | -3.968 | 0.026 | 0.17 | 1.24 |
| TG 60:1 | 990.9410 | 12.82 | [M+NH <sub>4</sub> ] <sup>+</sup> | -1.349 | 0.041 | 0.21 | 1.20 |
| TG 60:5 | 982.8842 | 12.11 | [M+NH <sub>4</sub> ] <sup>+</sup> | 4.521  | 0.015 | 0.13 | 0.69 |
| TG 60:7 | 978.8496 | 11.60 | [M+NH <sub>4</sub> ] <sup>+</sup> | 1.158  | 0.041 | 0.21 | 0.82 |

**Table S2.** Differential lipids in AF (negative ion mode)

| Significant metabolites | m/z       | Rt (min) | Adduction                            | PPM mass error | p value | FDR  | FC (CK/CP) |
|-------------------------|-----------|----------|--------------------------------------|----------------|---------|------|------------|
| FA 22:2                 | 335.2962  | 4.00     | [M-H] <sup>-</sup>                   | 2.017          | 0.026   | 0.13 | 0.56       |
| FA 22:4                 | 331.2630  | 2.85     | [M-H] <sup>-</sup>                   | -3.694         | 0.002   | 0.04 | 0.62       |
| FA 22:5                 | 329.2481  | 2.26     | [M-H] <sup>-</sup>                   | -1.499         | 0.002   | 0.04 | 0.56       |
| FA 24:4                 | 359.2942  | 3.76     | [M-H] <sup>-</sup>                   | -3.796         | 0.002   | 0.04 | 0.49       |
| FA 24:5                 | 357.28091 | 3.281    | [M-H] <sup>-</sup>                   | 2.817          | 0.002   | 0.04 | 0.62       |
| FA 26:1                 | 393.3745  | 5.81     | [M-H] <sup>-</sup>                   | 1.795          | 0.015   | 0.09 | 0.54       |
| FA 26:5                 | 385.3100  | 3.98     | [M-H] <sup>-</sup>                   | -3.124         | 0.002   | 0.04 | 0.35       |
| LPC 17:0                | 568.3639  | 1.89     | [M+CH <sub>3</sub> COO] <sup>-</sup> | 3.339          | 0.009   | 0.07 | 0.67       |
| LPC 22:0                | 638.4384  | 4.21     | [M+CH <sub>3</sub> COO] <sup>-</sup> | -2.964         | 0.045   | 0.17 | 0.45       |
| LPE O-16:0              | 438.3000  | 1.80     | [M-H] <sup>-</sup>                   | 2.264          | 0.041   | 0.16 | 0.36       |
| PC O-34:2               | 802.59784 | 6.58     | [M+CH <sub>3</sub> COO] <sup>-</sup> | 1.367          | 0.015   | 0.09 | 0.39       |
| PC O-38:4               | 854.6299  | 6.74     | [M+CH <sub>3</sub> COO] <sup>-</sup> | 2.15           | 0.041   | 0.16 | 0.60       |
| PC O-39:5               | 866.6317  | 5.99     | [M+CH <sub>3</sub> COO] <sup>-</sup> | -3.731         | 0.009   | 0.07 | 0.57       |
| PE O-42:7               | 802.5765  | 7.20     | [M-H] <sup>-</sup>                   | 1.154          | 0.041   | 0.16 | 0.52       |
| PI 35:2                 | 847.5294  | 4.87     | [M-H] <sup>-</sup>                   | -5.713         | 0.041   | 0.16 | 0.60       |
| PI 37:4                 | 871.5330  | 4.97     | [M-H] <sup>-</sup>                   | -1.356         | 0.041   | 0.16 | 0.50       |
| PI 40:4                 | 913.5756  | 5.59     | [M-H] <sup>-</sup>                   | -6.121         | 0.041   | 0.16 | 0.34       |
| SM 35:1;2O              | 775.5988  | 5.81     | [M+CH <sub>3</sub> COO] <sup>-</sup> | 2.247          | 0.004   | 0.05 | 0.61       |
| SM 36:1;2O              | 775.6005  | 6.14     | [M+HCOO] <sup>-</sup>                | 4.361          | 0.002   | 0.04 | 0.53       |
| SM 38:2;2O              | 815.6271  | 6.25     | [M+CH <sub>3</sub> COO] <sup>-</sup> | -1.591         | 0.004   | 0.05 | 0.56       |
| SM 40:2;2O              | 843.6611  | 6.92     | [M+CH <sub>3</sub> COO] <sup>-</sup> | 1.651          | 0.009   | 0.07 | 0.65       |
| SM 40:3;2O              | 841.6415  | 6.27     | [M+CH <sub>3</sub> COO] <sup>-</sup> | -3.027         | 0.002   | 0.04 | 0.61       |

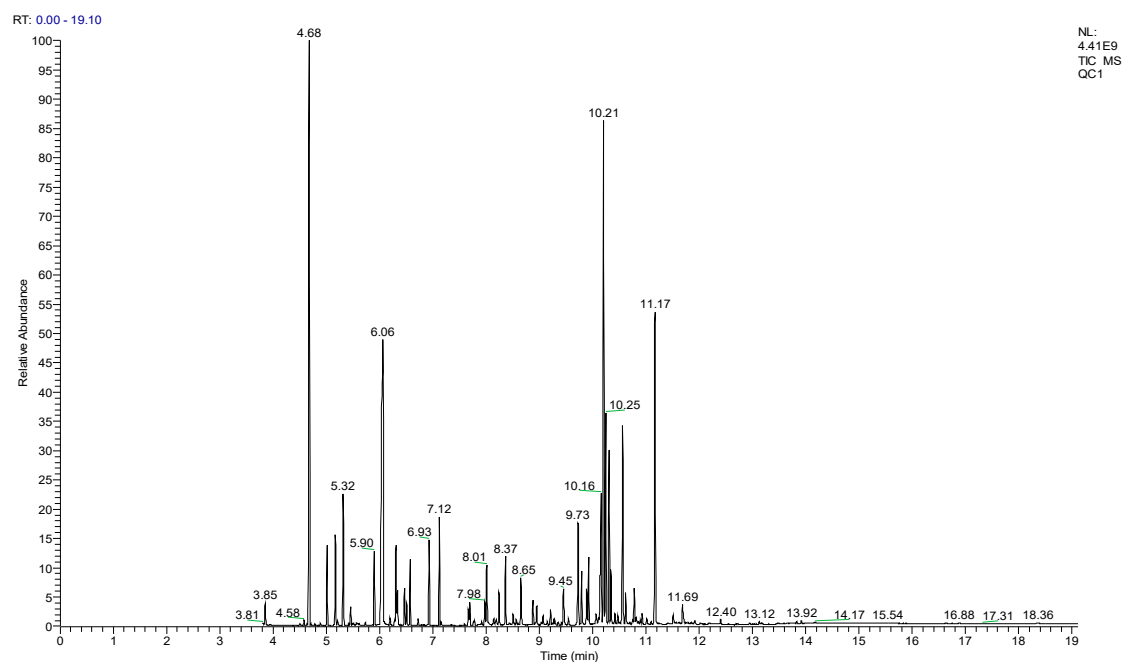

**Figure S4.** TICs of metabolites from rat AF of QC samples in GC-MS experiments.

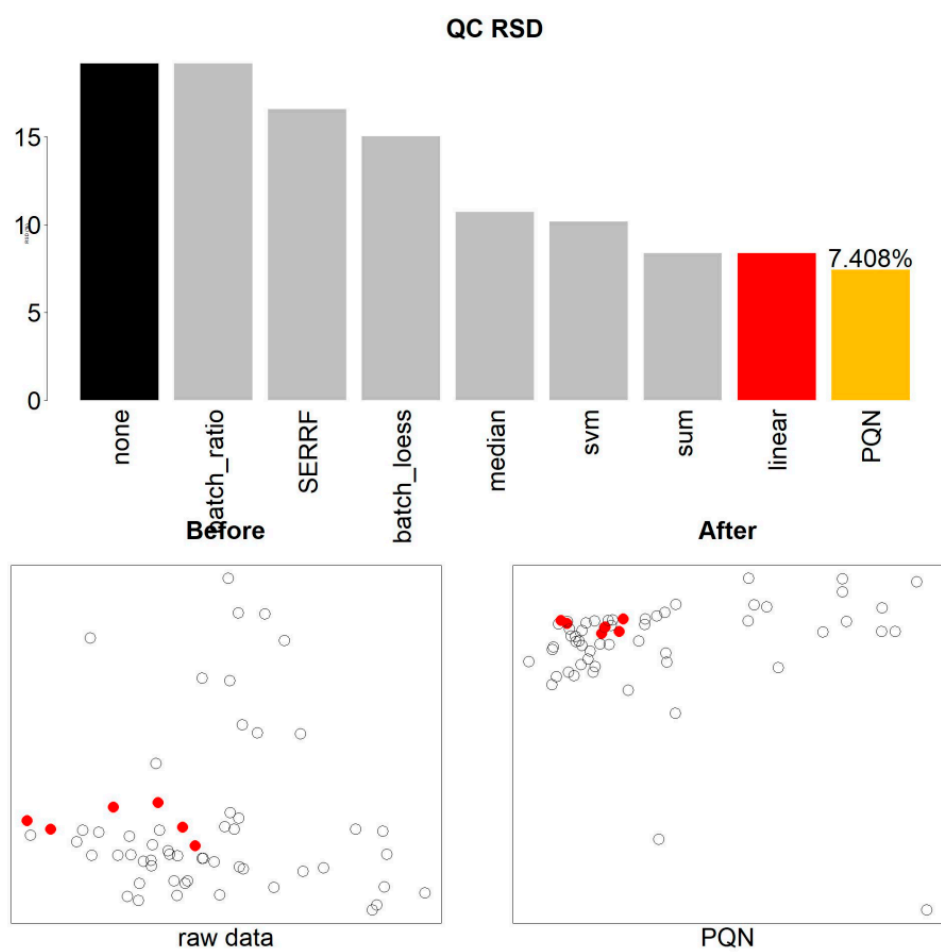

**Figure S5.** RSD values in QC samples obtained by different normalization methods in GC-MS experiments.

**Table S3.** Differential metabolites of AF detected in GC-MS

| Metabolite name      | FC   | p value | FDR   | HMDB        | PubChem | KEGG   |
|----------------------|------|---------|-------|-------------|---------|--------|
| (CK/CP)              |      |         |       |             |         |        |
| stearic acid         | 1.64 | 0.000   | 0.049 | HMDB0000827 | 5281    | C01530 |
| palmitic acid        | 1.60 | 0.000   | 0.049 | HMDB0000220 | 985     | C00249 |
| tryptophan           | 1.54 | 0.009   | 0.155 | HMDB0000929 | 6305    | C00078 |
| glycerol-1-phosphate | 0.59 | 0.005   | 0.109 | HMDB0000126 | 439162  | C00093 |
